1     **“Bolder” together – response to human social cues in free-ranging dogs**

2     Debottam Bhattacharjee<sup>1</sup>, Shubhra Sau<sup>1</sup>, and Anindita Bhadra<sup>1\*</sup>

3

4     **Affiliations:**

5     <sup>1</sup> Department of Biological Sciences, Indian Institute of Science Education and Research  
6     Kolkata, Nadia, West Bengal, India

7

8     \* **Correspondence**

9     Behaviour and Ecology Lab, Department of Biological Sciences,  
10    Indian Institute of Science Education and Research Kolkata  
11    Mohanpur Campus, Mohanpur,  
12    PIN 741246, West Bengal, INDIA  
13    *tel.* +91-33 6634 0000 ext 1223  
14    *fax* +91-33-25873020  
15    E-mail: [abhadra@iiserkol.ac.in](mailto:abhadra@iiserkol.ac.in) (AB)

16

17    **Summary statement** – Free-ranging dogs can benefit by living in groups over a solitary  
18    lifestyle while interacting with unfamiliar humans in urban habitats irrespective of having  
19    significant inter-individual differences.

20

21    **Abstract**

22    Interspecific interactions within an ecosystem have different direct and indirect effects on the  
23    two interacting species. In the urban environment, humans are a part of an interaction  
24    network of several species. While indirect human influence on different urban species has  
25    been measured extensively, experimental studies concerning direct human influence are  
26    lacking. In this study, we tested interactions between groups of urban free-ranging dogs  
27    (*Canis lupus familiaris*) and solitary unfamiliar humans in ecologically relevant contexts. We  
28    provided different sets of dogs with four commonly used human social cues (neutral,  
29    friendly, low and high impact threatening) to understand their responses at the group-level

30 and identify potential inter-individual differences. Finally, we compared data from a previous  
31 study to investigate the differences in behavioural outcomes between solitary and groups of  
32 dogs while interacting with humans. The study not only strengthens the idea of situation-  
33 relevant responsiveness in free-ranging dogs but also highlights the minute differences  
34 between solitary and group-level reactions in the form of higher approach and less anxious  
35 behaviour of groups towards the unfamiliar human. Additionally, we report inter-individual  
36 differences and the effect of sex while responding to the threatening cues. Our study suggests  
37 a direct benefit of group-living over a solitary lifestyle in free-ranging dogs while interacting  
38 with humans in the streets.

39 **Keywords:** Interspecific interactions, human social cues, group-living, dog-human  
40 relationship.

#### 41 **Introduction**

42 Behavioural adjustments during interspecific interactions are widespread in the animal world.  
43 Such interactions can involve both positive and negative stimuli from either or both the  
44 individuals of the interacting species. Of particular interest is how humans directly or  
45 indirectly influence the behaviour and personality of other animals living close to them. A  
46 range of species has been shown to alter their behaviour upon indirect human influence,  
47 especially in the context of urbanization. For example, urban hedgehogs alter their foraging  
48 behaviour to avoid crowded areas in daylight (Dowding et al., 2010), great tits use higher  
49 pitch in their calls in the noisy urban environment (Slabbekoorn and Peet, 2003; Zollinger et  
50 al., 2017), etc. On the contrary, the direct impact of human behaviour on animals has mostly  
51 been discussed using pet animals (Hosey and Melfi, 2014) and studies pertaining to the direct  
52 human impact on free-ranging animals are lacking. Free-ranging dogs (*Canis lupus*  
53 *familiaris*) are an excellent model system to evaluate the impact of interspecific interactions  
54 with humans in ecologically relevant contexts. These dogs regularly interact with humans in  
55 all possible human habitations in most of the developing countries (Sen Majumder et al.,  
56 2014; Vanak and Gompper, 2009). They substantially differ from pet dogs in terms of human  
57 socialisation, which in turn affects their learning ability (Brubaker et al., 2017; Brubaker et  
58 al., 2019, *in press*). Learning further allows individuals to fine-tune their behaviour to local  
59 environmental conditions by incorporating behavioural plasticity (Galef, 1995; Komers,  
60 1997; Mery and Burns, 2010; Sol et al., 2013). Unfortunately, a limited number of studies so

61 far have explored free-ranging dogs' socio-cognitive dynamics and their direct interactions  
62 with humans.

63 Social organization in free-ranging dogs can vary from solitary to groups (sometimes up to 15  
64 individuals, personal observation). Such flexibility in group size might have evolved as a by-  
65 product of foraging ecology and competition, but the underlying dynamics at the population  
66 level are yet to be understood. Foraging associations in free-ranging dogs are dynamic and  
67 can vary over different seasons, primarily driven by social needs (Sen Majumder et al., 2014).  
68 The social groups show interesting cooperation-conflict dynamics, with the presence of  
69 alloparenting by both related females and males on the one hand and mother-offspring  
70 conflict and milk theft on the other (Paul et al., 2014; Paul et al., 2015). Though the dogs live  
71 in stable social groups, unlike their closest living ancestors, the grey wolves (*Canis lupus*  
72 *lupus*), they do not display strict reproductive hierarchies and rarely hunt (Cafazzo et al.,  
73 2010; Font, 1987; Fox et al., 1975). Therefore, the evolution of flexible group size in dogs  
74 and the advantages of group living needs critical assessment. Comparative studies using  
75 individual and group level responses in various contexts can help shed light on the adaptive  
76 advantages of group living in dogs.

77 In an earlier study, we compared solitary individuals and groups of free-ranging dogs in  
78 problem-solving conditions (physical cognitive tasks) to understand their cognitive abilities,  
79 cooperation, and social tolerance. In spite of limited success rates in both the solitary and  
80 group conditions, cooperative motivations in terms of co-feeding and social tolerance were  
81 observed in groups (Bhattacharjee et al., under review). While such processes (social  
82 tolerance and cooperation) can facilitate group living, a more robust understanding of their  
83 adaptability to human habitats can be developed by observing their direct interactions with  
84 humans, focusing largely on their ecology. Free-ranging dogs have earlier been shown to  
85 comprehend context-dependent (friendly, threatening, etc.) human social cues. Their  
86 situation-specific responses to such cues reflect a great deal of understanding of human  
87 intentions, which is also vital for their survival in the human-dominated environment  
88 (Bhattacharjee et al., 2018). In this study, we aim to understand (a) the effects of varying  
89 human social cues on groups of free-ranging dogs, (b) differences in group and individual  
90 level responses (comparative approach), and (c) intra-group behavioural differences of  
91 individuals.

92 Living in groups sometimes help members to react or respond to a cue (stimuli) differently  
93 from a solitary individual. For example, a threatening signal can impact a solitary individual  
94 with a greater magnitude as compared to a group of individuals, where the impact of the  
95 threat would be reduced to a significant extent because of a ‘dilution effect’ (Lima, 1995;  
96 Stankowich and Blumstein, 2005). However, intra-group differences among individuals can  
97 still be present and get reflected in group responses. A major contributing factor responsible  
98 for differential outcomes to the same cue can be dominance-rank relationships within social  
99 groups (Francis, 2010; Rowell, 1974). Unfortunately, no studies till date have examined the  
100 relationship between personality and dominance in free-ranging dogs. This study is the first  
101 attempt to gather baseline information on group-level behavioural reactions to human social  
102 cues.

103 In India, free-ranging dogs are often considered as a menace and consequently beaten, shooed  
104 away, and even killed (Paul et al., 2016). Although they depend heavily on humans for  
105 sustenance, avoidance of direct contact with unfamiliar humans is also observed in free-  
106 ranging dogs, but social facilitation from humans can help dogs build trust with strangers  
107 (Bhattacharjee et al., 2017b). These dogs have also been shown to adjust their point-  
108 following behaviour flexibly based on the reliability of humans (Bhattacharjee et al., 2017a).  
109 Hence, it is evident from the prior studies that these dogs have a broad behavioural repertoire  
110 that allows them to behave flexibly, adjusting their responses to humans in a situation-  
111 specific manner. We hypothesize that groups of dogs would react to the different human  
112 social cues in a similar situation-specific manner. We used published data on solitary dogs’  
113 responses to human social cues from Bhattacharjee et al., 2018 for comparative analysis with  
114 the group-level data We also hypothesize that groups would display less anxious behavioural  
115 reactions to threatening cues as compared to solitary individuals as a result of the dilution  
116 effect. Additionally, intra-group behavioural differences would be present due to variations in  
117 personality traits. We expect no effect of sex as a function of inter-individual differences in  
118 the reactions towards the social cues.

## 119 **Methods**

### 120 **A. Subjects and study areas**

121 We tested 80 adult-only groups of free-ranging dogs with a minimum group size of 3  
122 (average group size:  $3.53 \pm 0.89$ ). Individuals that were sighted to be either resting or moving  
123 together, up to a distance of 1 meter of each other, were considered as a group. Groups were

124 located randomly in the following areas - Kalyani (22°58'30"N, 88°26'04"E), Kolkata  
125 (22°57'26"N, 88°36'39"E), Mohanpur (22°56'49"N and 88°32'4"E) and Sodepur  
126 (22°69'82"N and 88°38'95"E), West Bengal, India. No prior information regarding the  
127 composition and location of the groups tested were available. Sexes of all the dogs were  
128 determined by observing their genitalia and additionally, phenotypic details such as coat  
129 colour, scar marks were recorded to prevent resampling. To further rule out any possibility of  
130 resampling, we tested groups from different locations on different days.

## 131 **B. Experimental Procedure**

132 We used three different types of social cues to investigate the response of free-ranging dog  
133 groups towards an unfamiliar human. Each group was tested only once with a randomly  
134 assigned cue. An additional set of 20 groups was tested without any cue and were considered  
135 as the control set. The experimental procedure detailed below is identical to the one followed  
136 earlier for solitary dogs (Bhattacharjee et al., 2018), and is reported here again for  
137 convenience. Experimentation was carried out wherever the groups were found (e.g., streets,  
138 markets, residential areas, etc.). Thus, it can be assumed that all groups were tested within  
139 their territories. Two experimenters, namely E1 and E2, were involved and consistent  
140 throughout the study. Both E1 and E2 were young males, 28 years old, 160 – 165 cm in  
141 height with a similar physical build. The videos were recorded using a Sony HDR-PJ410  
142 camera mounted on a tripod.

143 **(i) Attention seeking phase** - E2 attracted the attention of a group of dogs using  
144 vocalisations for 1-2 seconds (Bhattacharjee et al., 2017a).

145 **(ii) Transition phase** - Once the dogs were alerted, E2 left the place and stood behind the  
146 camera. E2 made sure that all the members of a group were informed. E1 appeared at the  
147 position where E2 was standing initially. The duration of this phase was 10 seconds.

148 **(iii) Social cue phase (SCP)** – E1 stood approximately 1.5 meters away from the dogs,  
149 facing them. E1 had to adjust his position to maintain the approximate distance of 1.5 meters  
150 (since dogs were not on a leash). Upon standing, E1 provided any of the following social cues  
151 for 30 seconds, and 20 groups were tested with each of the cues detailed below.

- 152 • *Friendly Cue (FC)* - E1 enacted a friendly gesture by bending slightly forward, extending  
153 both his arms. E1 gazed towards the dogs while providing the cue, but refrained from  
154 touching (in case of approach) the dogs deliberately to avoid any potential contact bias.

- 155 • *Low impact threatening (LIT)* - E1 raised one of his hands (counterbalanced), kept it  
156 motionless and gazed at the dogs. This cue was used to emulate a low level of threat that  
157 people often use to shoo away dogs.
- 158 • *High impact threatening (HIT)* - E1 used a 0.45-meter long wooden stick in his hand  
159 (counterbalanced) to provide an enhanced version of the LIT cue. E1 was facing the dogs  
160 while enacting the gesture (see Supplementary **Movie 1**). The HIT cue was considered to  
161 be a more severe threat than LIT and is also a typical behaviour observed in Indian  
162 streets.
- 163 • *Neutral Cue (NC) / Control* - E1 stood in a neutral posture, looked straight ahead without  
164 providing any cue.

165 **(iv) Food transfer phase** - E2 arrived and handed over a piece of raw chicken (food reward)  
166 to E1 and left. Food transfer was carried out quickly ( $\leq 10$  seconds) without allowing the  
167 dogs to see it.

168 **(v) Food provisioning phase (FPP)** – E1 placed the food reward on the ground,  
169 approximately 0.3-meter in front of him, thus at a distance of  $\sim 1.2$  meters from the dogs. E1  
170 did not make any eye contact with the dogs after placing the food reward. FPP was carried  
171 out for 30 seconds or until a dog (or dogs) obtained the food, whichever was earlier.

## 172 **C. Data Analysis and statistics**

173 We coded the following parameters – approach and no approach (SCP and FPP), first  
174 reaction (SCP), human proximity (SCP), latency (FPP), duration of gazing (SCP and FPP),  
175 and duration of feeding time (FPP) (see **Table S1**). A particular behavioural outcome was  
176 treated as a group response when the majority of the group members exhibited it (for  
177 numerical data, the average value was taken). During data analyses, we paid attention to both  
178 group-level responses and intra-group behavioural differences. First, we quantified the  
179 parameters mentioned above to find out free-ranging dog groups' understanding of human  
180 social cues, and then we compared the group responses with solitary dogs' behavioural  
181 outcomes using the earlier data. We built an index called the 'Response Index' (RI) to better  
182 understand free-ranging dogs' responsiveness to human social cues when present solitarily  
183 and in groups (**Table 1**). RI included the following factors - latency to approach, the position  
184 of an individual, feeding in human proximity, and gazing at E1 and conspecifics. RI had a  
185 scale of 4 – 15, which was further divided into three categories – “High Response” (scores:  
186 12 – 15), “Intermediate Response” (scores: 8 – 11), and “Low Response” (scores: 4 – 7).

187 Higher RI values were considered to be indicative of dogs' 'sociability' and 'bold'  
188 behavioural tendencies, while lower values suggested a 'fearful' and 'shy' behavioural  
189 repertoire. Although RI had the capacity of measuring intra-group differences, it could not  
190 assess the personality traits (or temperament) due to a lack of test repeatability (in various  
191 contexts) in the given experimental set-up.

192 **Table 1. Response index incorporating the parameters and their corresponding scores.**

| <b>1. Latency to approach</b>        |              |
|--------------------------------------|--------------|
| <b>Category</b>                      | <b>Score</b> |
| 1 – 2 seconds                        | 4            |
| 3 – 5 seconds                        | 3            |
| 6 – 9 seconds                        | 2            |
| > 10 seconds                         | 1            |
| No latency                           | 0            |
| <b>2. Position of an individual</b>  |              |
| <b>Category</b>                      | <b>Score</b> |
| Approach                             | 3            |
| Same                                 | 2            |
| Distant                              | 1            |
| <b>3. Feeding in human proximity</b> |              |
| <b>Category</b>                      | <b>Score</b> |
| Yes                                  | 2            |
| No                                   | 1            |
| <b>4. Gazing at E1</b>               |              |
| <b>Category</b>                      | <b>Score</b> |
| No                                   | 3            |
| Short (1 – 2 seconds)                | 2            |
| Prolonged (> 3 seconds)              | 1            |
| <b>5. Gazing at conspecifics</b>     |              |
| <b>Category</b>                      | <b>Score</b> |
| No                                   | 3            |
| Short (1 – 2 seconds)                | 2            |
| Prolong (> 3 seconds)                | 1            |

193

194 We used non-parametric tests throughout the analyses. Generalized linear mixed model  
195 (GLMM) analysis was carried out using “lme4” package of R Studio. A naïve coder coded  
196 20% of the data to check inter-rater reliability, and it was found to be very high (Approach:  
197 Cohen’s kappa = 1.00; Proximity: Cohen’s kappa = 0.85; Gazing: Cohen’s kappa = 0.86;  
198 Latency: Cohen’s kappa = 0.88). The alpha level was 0.05, but was adjusted using Bonferroni  
199 correction for post-hoc comparisons, whenever required. We coded all the behaviours from  
200 the videos in a frame-by-frame manner using Pot player (version 1.7.18344). Statistical  
201 analyses were performed using R (R Development Core Team, 2015) and StatistiXL version  
202 1.11.0.0.

## 203 **Results**

### 204 **A. Group-level response**

205 *Approach* – In SCP, 12 groups out of 20 approached even when they received no cue (NC).  
206 Later, the number increased to 17 in the FPP, but the two response levels were not  
207 significantly different ( $\chi^2$  Goodness of fit:  $\chi^2=0.862$ ,  $df = 1$ ,  $p = 0.353$ ). Similar to NC, we  
208 found the number of approaches between the two phases to be comparable for FC (no. of  
209 approaches – SCP - 20, FPP – 20,  $\chi^2$  Goodness of fit:  $\chi^2=0.000$ ,  $df = 1$ ,  $p = 1.000$ ) and LIT  
210 (no. of approaches – SCP – 6, FPP – 13,  $\chi^2$  Goodness of fit:  $\chi^2 = 2.579$ ,  $df = 1$ ,  $p = 0.108$ )  
211 conditions. We found a difference between the responses in the two phases of the HIT  
212 condition (no. of approaches – SCP – 0, FPP – 6,  $\chi^2$  Goodness of fit:  $\chi^2 = 6.000$ ,  $df = 1$ ,  $p =$   
213  $0.014$ , see **Fig. 1a**).

214 Across conditions, we found the following results (**Fig. 1a**) - a higher number of groups  
215 approached in the SCP of FC than both LIT ( $\chi^2$  Goodness of fit:  $\chi^2 = 7.538$ ,  $df = 1$ ,  $p = 0.006$ )  
216 and HIT ( $\chi^2$  Goodness of fit:  $\chi^2 = 20.000$ ,  $df = 1$ ,  $p < 0.001$ ) conditions. Groups were also  
217 found to approach more in the SCP of the NC than the HIT condition ( $\chi^2$  Goodness of fit:  $\chi^2 =$   
218  $12.000$ ,  $df = 1$ ,  $p = 0.001$ ). We did not find comparisons between NC – FC, NC – LIT to be  
219 significant (**Table S2**). The FPP of HIT differed from both the NC ( $\chi^2$  Goodness of fit:  $\chi^2 =$   
220  $5.261$ ,  $df = 1$ ,  $p = 0.02$ ) and FC ( $\chi^2$  Goodness of fit:  $\chi^2 = 7.538$ ,  $df = 1$ ,  $p = 0.006$ ) conditions.  
221 There was no difference in the responses between NC – FC, NC – LIT, FC – LIT, and LIT –  
222 HIT conditions of FPP.



223 *No approach* – We observed ‘distant no approach’ only in the LIT and HIT conditions. The  
224 differences between SCP and FPP of the two conditions were significant (Contingency Table  
225  $\chi^2$ :  $\chi^2 = 7.804$ ,  $df = 1$ ,  $p = 0.005$ , **Fig. 1b**). Both in the LIT and HIT conditions, we obtained  
226 significantly higher ‘distant no approach’ in SCP compared to FPP (LIT –  $\chi^2$  Goodness of fit:  
227  $\chi^2 = 14.000$ ,  $df = 1$ ,  $p < 0.001$ ; HIT –  $\chi^2$  Goodness of fit:  $\chi^2 = 6.000$ ,  $df = 1$ ,  $p = 0.01$ ). We also  
228 found the across-category comparisons to be significantly different (SCP -  $\chi^2$  Goodness of fit:  
229  $\chi^2 = 28.595$ ,  $df = 1$ ,  $p < 0.001$ ; FPP -  $\chi^2$  Goodness of fit:  $\chi^2 = 36.000$ ,  $df = 1$ ,  $p < 0.001$ ). The  
230 number of ‘distant no approaches’ were significantly higher in HIT for both the phases  
231 compared to LIT.

232 *First behaviour during social cue* – All the groups reacted upon receiving the social cues.  
233 Gazing, gazing with tail wagging and scared were the specific responses that have been  
234 observed across conditions. In the NC condition, we found all the groups showing gazing  
235 behaviour towards E1. None of the groups showed gazing with tail wagging or scared  
236 responses (**Fig 2a**). Groups showed both gazing and gazing with tail wagging behaviours in  
237 the FC condition at equal levels ( $\chi^2$  Goodness of fit:  $\chi^2 = 3.200$ ,  $df = 1$ ,  $p = 0.07$ ), but did not  
238 display scared responses (**Fig 2b**). In the LIT condition, groups showed scared responses  
239 significantly more than gazing with tail wagging ( $\chi^2$  Goodness of fit:  $\chi^2 = 6.231$ ,  $df = 1$ ,  $p =$   
240  $0.01$ ), but gazing and scared responses were comparable ( $\chi^2$  Goodness of fit:  $\chi^2 = 0.889$ ,  $df =$   
241  $1$ ,  $p = 0.34$ , **Fig 2c**). Gazing and gazing with tail wagging behaviours were also comparable  
242 ( $\chi^2$  Goodness of fit:  $\chi^2 = 2.778$ ,  $df = 1$ ,  $p = 0.09$ ). HIT condition had a strong impact on dogs  
243 as all the groups showed only scared responses (**Fig 2d**).

244 *Human proximity* – Groups showed variations in the duration of human proximity for  
245 different cues (Kruskal Wallis test:  $\chi^2 = 47.259$ ,  $df = 3$ ,  $p < 0.001$ ). Post-hoc pairwise  
246 comparisons revealed that groups spent a significantly higher amount of time near E1 in the  
247 FC, as compared to the NC, LIT, and HIT conditions (**Table S2**). We also found a  
248 significantly higher duration of proximity to E1 in the NC compared to the HIT condition  
249 (**Table S2**). However, we did not obtain any difference between the NC - LIT, and LIT – HIT  
250 conditions (**Table S2**).

251 *Gazing* – Generalised linear mixed model (GLMM) analysis revealed significant effects of  
252 the types of cues, and SCP on the duration of gazing at E1 (**Table S3**). We also compared the  
253 cumulative (pooled for all cues) duration of gazing between SCP and FPP (Mann-Whitney U  
254 test:  $U = 70358.500$ ,  $df1 = 283$ ,  $df2 = 283$ ,  $p < 0.001$ , **Fig 3**). Across-phase comparisons

255 revealed higher duration of gazing in SCP for each of the cues (NC – Mann-Whitney U test:  
256  $U = 4058.500$ ,  $df_1 = 68$ ,  $df_2 = 68$ ,  $p < 0.001$ ; FC - Mann-Whitney U test:  $U = 4549.000$ ,  $df_1$   
257  $= 68$ ,  $df_2 = 68$ ,  $p < 0.001$ ; LIT - Mann-Whitney U test:  $U = 3030.500$ ,  $df_1 = 62$ ,  $df_2 = 62$ ,  $p <$   
258  $0.001$ ; HIT - Mann-Whitney U test:  $U = 5827.500$ ,  $df_1 = 85$ ,  $df_2 = 85$ ,  $p < 0.001$ ).

259 *Latency and duration of feeding* – The latencies of the first members that approached in the  
260 FPP of the four conditions ( $N = 57$ ) showed significant variation (Kruskal-Wallis test:  $\chi^2$   
261  $=34.011$ ,  $df = 2$ ,  $p < 0.001$ ). Dogs showed a tendency to approach significantly faster in the  
262 FC than the NC, LIT, and HIT conditions (**Table S2**). We also found differences between NC  
263 and LIT, with dogs showing faster approach in NC (**Table S2**). However, we did not see any  
264 difference between LIT and HIT, and NC – HIT conditions (**Table S2**).

265 The feeding time comparable among the four conditions (Kruskal-Wallis test:  $\chi^2 = 1.161$ ,  $df =$   
266  $3$ ,  $p = 0.762$ ). We did not observe the group members sharing food among themselves in any  
267 of the conditions.

## 268 **B. Comparison of individual and group responses**

269 We compared five major parameters across the two sets of experiments – approach, first  
270 behaviour after social cue, latency, proximity to human, and duration of gazing.

271 *Approach* – Groups showed a higher approach rate than solitary individuals ( $\chi^2$  Goodness of  
272 fit:  $\chi^2 = 15.933$ ,  $df = 1$ ,  $p < 0.001$ ).

273 *First behaviour after social cue* – The first reactions differed between the individual and  
274 group levels (**Fig 4**). Groups showed a significantly higher duration of gazing behaviour (at  
275 E1) than solitary individuals ( $\chi^2$  Goodness of fit:  $\chi^2 = 25.752$ ,  $df = 1$ ,  $p < 0.001$ ). Apart from  
276 gazing, all the other responses were displayed at a higher rate by the solitary dogs (gazing  
277 with tail wagging -  $\chi^2$  Goodness of fit:  $\chi^2 = 8.526$ ,  $df = 1$ ,  $p = 0.004$ ; scared -  $\chi^2$  Goodness of  
278 fit:  $\chi^2 = 11.792$ ,  $df = 1$ ,  $p = 0.001$ ; no reaction -  $\chi^2$  Goodness of fit:  $\chi^2 = 8.000$ ,  $df = 1$ ,  $p =$   
279  $0.005$ ).

280 *Latency* – Latencies were comparable between individuals and groups for all the conditions  
281 in FPP (NC - Mann-Whitney U test:  $U = 177.000$ ,  $df_1 = 17$ ,  $df_2 = 17$ ,  $p = 0.27$ ; FC - Mann-  
282 Whitney U test:  $U = 318.500$ ,  $df_1 = 20$ ,  $df_2 = 30$ ,  $p = 0.71$ ; LIT - Mann-Whitney U test:  $U =$   
283  $85.500$ ,  $df_1 = 13$ ,  $df_2 = 13$ ,  $p = 1.00$ ; HIT - Mann-Whitney U test:  $U = 4.500$ ,  $df_1 = 6$ ,  $df_2 =$   
284  $1$ ,  $p = 0.57$ ).

285 *Duration of proximity to E1* – Generalised linear model (GLM) analysis showed significant  
286 effects of groups and solitary conditions and cue types on the duration of proximity to E1  
287 (**Table S4**). Overall, the duration of proximity was found to be significantly higher for the  
288 groups ( $4.41 \pm 5.97$  sec) as compared to individuals ( $3.45 \pm 7.36$  sec).

289 *Duration of gazing at E1* – GLM analysis revealed significant effects of groups and solitary  
290 conditions, cue types, and phases on the duration of gazing at E1 (**Fig S1, Table S5**). We  
291 found both individual and interactive effects of predictors (dog composition type, cue, phase)  
292 on the gazing duration. Gazing was found to be significantly higher in SCP for both the  
293 individuals and groups, as compared to FPP (Individuals - Mann-Whitney U test:  $U =$   
294  $10749.000$ ,  $df1 = 120$ ,  $df2 = 120$ ,  $p < 0.001$ ; Groups - Mann-Whitney U test:  $U =$   
295  $5868.000$ ,  $df1 = 80$ ,  $df2 = 80$ ,  $p < 0.001$ ). We also found a difference between the individuals and  
296 groups in FPP (Mann-Whitney U test:  $U = 5831.500$ ,  $df1 = 120$ ,  $df2 = 80$ ,  $p = 0.01$ ) with  
297 individuals showing higher duration of gazing. However, the gazing duration was comparable  
298 in the SCP phase (Mann-Whitney U test:  $U = 4935.500$ ,  $df1 = 120$ ,  $df2 = 80$ ,  $p = 0.73$ ).

### 299 **C. Intra-group differences –**

300 *Response Index* – RI values differed between the different cues (Kruskal Wallis test:  $\chi^2 =$   
301  $100.320$ ,  $df = 3$ ,  $p < 0.001$ ). Post-hoc pairwise comparisons revealed significant differences  
302 between NC – FC (Mann-Whitney U test:  $U = 3037.500$ ,  $df1 = 67$ ,  $df2 = 68$ ,  $p = 0.001$ ,  
303 higher RI values in FC), NC – HIT (Mann-Whitney U test:  $U = 4583.000$ ,  $df1 = 68$ ,  $df2 = 85$ ,  
304  $p < 0.001$ , higher RI values in NC), FC – LIT (Mann-Whitney U test:  $U = 3292.500$ ,  $df1 =$   
305  $68$ ,  $df2 = 62$ ,  $p < 0.001$ , higher RI values in FC), FC – HIT (Mann-Whitney U test:  $U =$   
306  $5357.000$ ,  $df1 = 68$ ,  $df2 = 85$ ,  $p = 0.73$ , higher RI values in FC), and LIT – HIT (Mann-  
307 Whitney U test:  $U = 3871.500$ ,  $df1 = 62$ ,  $df2 = 85$ ,  $p < 0.001$ , higher RI values in LIT). We  
308 did not find any difference between NC – LIT (Mann-Whitney U test:  $U = 2585.000$ ,  $df1 =$   
309  $68$ ,  $df2 = 62$ ,  $p = 0.02$ ). Additionally, 25%, 95%, 0%, and 10% of the groups showed the  
310 highest RI value (i.e. “15”) in NC, FC, LIT, and HIT conditions respectively. We also  
311 calculated the percentages of the groups showing RI values ranging from 12 to 15 (designated  
312 as high responders). We found that 70%, 100%, 45%, and 35% of the groups obtained RI  
313 values from 12 to 15 in NC, FC, LIT, and HIT conditions.

314 In the NC condition, 14 groups had high responders; out of these, three groups had more than  
315 one individual as high responder ( $\chi^2$  Goodness of fit:  $\chi^2 = 4.571$ ,  $df = 1$ ,  $p = 0.03$ ). In the FC  
316 condition, all 20 groups had one or more individuals as high responders, out of which, seven

317 groups had only one high responder ( $\chi^2$  Goodness of fit:  $\chi^2 = 1.800$ ,  $df = 1$ ,  $p = 0.18$ , **Fig 5a**).  
318 We found all nine groups in the LIT condition to have only one member as high responder ( $\chi^2$   
319 Goodness of fit:  $\chi^2 = 9.000$ ,  $df = 1$ ,  $p = 0.003$ , **Fig 5b**). In the HIT condition, only one of the  
320 seven groups had multiple high responders ( $\chi^2$  Goodness of fit:  $\chi^2 = 3.571$ ,  $df = 1$ ,  $p = 0.05$ ,  
321 **Fig 5c**).

322 *Effect of sex on high responders* – We found that overall (all cue types, pooled data), 52  
323 males and 30 females were high responders ( $\chi^2$  Goodness of fit:  $\chi^2 = 5.902$ ,  $df = 1$ ,  $p = 0.01$ ).  
324 We did not find any difference at the sex ratio of the total dogs tested in the study ( $\chi^2$   
325 Goodness of fit:  $\chi^2 = 2.972$ ,  $df = 1$ ,  $p = 0.08$ ). We further analysed the responses in the two  
326 threatening cue conditions and found that the number of male high responders were higher  
327 than females ( $\chi^2$  Goodness of fit:  $\chi^2 = 8.000$ ,  $df = 1$ ,  $p = 0.005$ ), suggesting that males might be  
328 bolder than females.

## 329 **Discussion**

330 This study corroborates earlier findings of free-ranging dogs' situation-specific responses  
331 towards varying human social cues (Bhattacharjee et al., 2018). Our results highlight the  
332 differences between solitary and group-level reactions, with dogs showing a “bolder”  
333 response when in groups. We further provide the first evidence of sex difference in the bold  
334 behavioural tendency of free-ranging dogs while responding to threatening cues from  
335 humans. Higher approach rates, less anxious or fearful behaviours were the key features that  
336 differentiated the response of dog groups from that of the solitary individuals to threatening  
337 cues, suggesting a direct benefit of group-living over a solitary lifestyle.

338 The general pattern of response to the different cues by groups was similar to that of the  
339 solitary dogs. However, the approach rate was found to be higher in groups, especially in the  
340 SCP of LIT, providing evidence of a less effective LIT cue when the dogs were in a group. In  
341 India, solitary dogs on streets are more prone to receive threatening signals from humans as  
342 compared to groups of dogs (personal observations). It could also be a consequence of the  
343 higher perception of threat or shyness towards unfamiliar humans that solitary dogs avoid  
344 making direct physical contact with unfamiliar humans (Bhattacharjee et al., 2017b). Studies  
345 show that animals living in groups are less vigilant than their solitary counterparts in various  
346 ecological contexts (Delm, 1990; Dimond and Lazarus, 1974; Quenette and Gerard, 1992).  
347 However, in our experiments, gazing at the experimenter as a reaction to social cues was  
348 found to be a significant behaviour in the free-ranging dog groups. We suspect that the free-

349 ranging dogs, due to the constant anthropogenic stress in their environment, are naturally  
350 vigilant, and the gazing response is a part of their behavioural repertoire. Moreover, they are  
351 territorial and need to defend their territories from intruders, including humans, other dogs,  
352 and other animals, giving rise to a complex and dynamic behavioural system. They typically  
353 defend their territories in groups, while solitary dogs typically are more prone to avoid  
354 situations of conflict either with other dogs or humans.

355 Our results revealed an interesting pattern regarding the behavioural tendencies of groups. At  
356 the intra-group level, dogs differed in terms of their responses, e.g. a majority of the dogs  
357 were high responders in the FC condition. Though there was a gradual decrease in the  
358 number of high responders from FC to the threatening cue conditions (LIT and HIT), they  
359 nevertheless were not absent in the situations of threat. This suggests that within a group,  
360 there are individuals with varying personalities/ temperaments, and the high responders can  
361 be considered to show “bold” behavioural tendencies. It should be noted that males tended to  
362 be bolder than females, in this context. This study opens up the need for further explorations  
363 into context-dependent responses in free-ranging dog groups to understand how different  
364 behavioural types emerge in the groups and the underlying role of sex in the development of  
365 a bold temperament.

366 Free-ranging dogs, irrespective of their social composition enact situation-relevant reactions  
367 to commonly used human social cues. Our results suggest a potential advantage of group  
368 living in dogs over a solitary lifestyle when it comes to interacting with humans, especially in  
369 unfavourable circumstances. This ecological advantage need not be driven by the benefits of  
370 kin selection (Hamilton, 1964), but would nevertheless be amplified in the evolutionary  
371 timescale, if group members are closely related to each other, which often tends to be the case  
372 (Paul et al., 2015). While a certain degree of difference is evident, solitary and groups of free-  
373 ranging dogs mostly overlapped in their pattern of responses, probably depicting the best  
374 possible strategy adapted to living in the human-dominated environment. Therefore, we  
375 assume that a lack in supply of ample amounts of human subsidized food and competition  
376 could be the potential conflicting factors that ultimately influence group size and stability,  
377 causing a flexible nature of social composition in free-ranging dogs. Future studies using the  
378 postulates of ‘Resource Dispersion Hypothesis’ (RDH) would be useful to have vital  
379 information on the mechanisms that govern group formation and splitting in dogs  
380 (Macdonald and Johnson, 2015). Information regarding the potential differences between the

381 behavioural tendencies of free-ranging dogs can further be checked by linking dominance-  
382 rank relationships.

383 Our study revealed significant insights into the dog-human relationship on the streets.  
384 Understanding the intents of humans is crucial for these dogs to adjust their behavioural  
385 responses accordingly. Above all, these situation-relevant responses to human social cues can  
386 provide us with the direction required for tackling and mitigating the rapidly increasing free-  
387 ranging dog-human conflict in most of the developing countries.

388

### 389 **References**

390 **Bhattacharjee, D., N., N. D., Gupta, S., Sau, S., Sarkar, R., Biswas, A., Banerjee, A.,**  
391 **Babu, D., Mehta, D. and Bhadra, A.** (2017a). Free-ranging dogs show age related  
392 plasticity in their ability to follow human pointing. *PLOS ONE* **12**, e0180643.

393 **Bhattacharjee, D., Sau, S., Das, J. and Bhadra, A.** (2017b). Free-ranging dogs prefer  
394 petting over food in repeated interactions with unfamiliar humans. *The Journal of*  
395 *Experimental Biology* **220**, 4654–4660.

396 **Bhattacharjee, D., Sau, S. and Bhadra, A.** (2018). Free-Ranging Dogs Understand Human  
397 Intentions and Adjust Their Behavioral Responses Accordingly. *Frontiers in Ecology*  
398 *and Evolution*.

399 **Brubaker, L., Dasgupta, S., Bhattacharjee, D., Bhadra, A. and Udell, M. A. R.** (2017).  
400 Differences in problem-solving between canid populations: Do domestication and  
401 lifetime experience affect persistence? *Animal Cognition*.

402 **Cafazzo, S., Valsecchi, P., Bonanni, R. and Natoli, E.** (2010). Dominance in relation to  
403 age, sex, and competitive contexts in a group of free-ranging domestic dogs. *Behavioral*  
404 *Ecology*.

405 **Delm, M.** (1990). Vigilance for predators: detection and dilution effects. *Behavioral Ecology*  
406 *and Sociobiology* **26**,.

407 **Dimond, S. and Lazarus, J.** (1974). The Problem of Vigilance in Animal Life. *Brain,*  
408 *Behavior and Evolution* **9**, 60–79.

409 **Dowding, C. V., Harris, S., Poulton, S. and Baker, P. J.** (2010). Nocturnal ranging

- 410 behaviour of urban hedgehogs, *Erinaceus europaeus*, in relation to risk and reward.  
411 *Animal Behaviour*.
- 412 **Font, E.** (1987). Spacing and social organization: Urban stray dogs revisited. *Applied Animal*  
413 *Behaviour Science* **17**, 319–328.
- 414 **Fox, M. W., Beck, A. M. and Blackman, E.** (1975). Behavior and ecology of a small group  
415 of urban dogs (*Canis familiaris*). *Applied Animal Ethology* **1**, 119–137.
- 416 **Francis, R. C.** (2010). On the Relationship between Aggression and Social Dominance.  
417 *Ethology* **78**, 223–237.
- 418 **Galef, B. G.** (1995). Why behaviour patterns that animals learn socially are locally adaptive.  
419 *Animal Behaviour*.
- 420 **Hamilton, W. D.** (2017). The Genetical Evolution of Social Behavior. II. In *Group Selection*,  
421 pp. 44–90. Routledge.
- 422 **Hosey, G. and Melfi, V.** (2014). Human-Animal Interactions, Relationships and Bonds: A  
423 Review and Analysis of the Literature. *International Journal of Comparative*  
424 *Psychology*.
- 425 **Komers, P. E.** (1997). Behavioural plasticity in variable environments. *Canadian Journal of*  
426 *Zoology*.
- 427 **Lima, S. L.** (1995). Back to the basics of anti-predatory vigilance: the group-size effect.  
428 *Animal Behaviour* **49**, 11–20.
- 429 **Macdonald, D. W. and Johnson, D. D. P.** (2015). Patchwork planet: the resource dispersion  
430 hypothesis, society, and the ecology of life. *Journal of Zoology* **295**, 75–107.
- 431 **Majumder, S. Sen, Bhadra, A., Ghosh, A., Mitra, S., Bhattacharjee, D., Chatterjee, J.,**  
432 **Nandi, A. K. and Bhadra, A.** (2014). To be or not to be social: foraging associations of  
433 free-ranging dogs in an urban ecosystem. *acta ethologica* **17**, 1–8.
- 434 **Mery, F. and Burns, J. G.** (2010). Behavioural plasticity: An interaction between evolution  
435 and experience. *Evolutionary Ecology*.
- 436 **Paul, M., Majumder, S. Sen and Bhadra, A.** (2014). Grandmotherly care: a case study in  
437 Indian free-ranging dogs. *Journal of Ethology* **32**, 75–82.
- 438 **Paul, M., Majumder, S. Sen, Nandi, A. K. and Bhadra, A.** (2015). Selfish mothers indeed!

- 439 Resource-dependent conflict over extended parental care in free-ranging dogs. *Royal*  
440 *Society Open Science*.
- 441 **Paul, M., Sen Majumder, S., Sau, S., Nandi, A. K. and Bhadra, A.** (2016). High early life  
442 mortality in free-ranging dogs is largely influenced by humans. *Scientific Reports* **6**,  
443 19641.
- 444 **Quenette, P. Y. and Gerard, J. F.** (1992). From individual to collective vigilance in wild  
445 boar (*Sus scrofa*). *Canadian Journal of Zoology*.
- 446 **R Development Core Team** (2015). R: A language and environment for statistical  
447 computing. R Foundation for Statistical Computing, Vienna, Austria. URL  
448 <http://www.R-project.org/>. *R Foundation for Statistical Computing, Vienna, Austria*.
- 449 **Rowell, T. E.** (1974). The concept of social dominance. *Behavioral Biology*.
- 450 **Slabbekoorn, H. and Peet, M.** (2003). Birds sing at a higher pitch in urban noise. *Nature*.
- 451 **Sol, D., Lapedra, O. and González-Lagos, C.** (2013). Behavioural adjustments for a life in  
452 the city. *Animal Behaviour*.
- 453 **Stankowich, T. and Blumstein, D. T.** (2005). Fear in animals: a meta-analysis and review of  
454 risk assessment. *Proceedings of the Royal Society B: Biological Sciences* **272**, 2627–  
455 2634.
- 456 **Vanak, A. T. and Gompper, M. E.** (2009). Dietary Niche Separation Between Sympatric  
457 Free-Ranging Domestic Dogs and Indian Foxes in Central India. *Journal of Mammalogy*  
458 **90**, 1058–1065.
- 459 **Zollinger, S. A., Slater, P. J. B., Nemeth, E. and Brumm, H.** (2017). Higher songs of city  
460 birds may not be an individual response to noise. *Proceedings of the Royal Society B:*  
461 *Biological Sciences*.

462

### 463 **Acknowledgements**

464 DB would like to thank DST INSPIRE for providing the research fellowship. The authors  
465 thank IISER Kolkata for infrastructural support.

### 466 **Funding statement**



467 We received no funding for the study.

#### 468 **Authors' contributions**

469 Conceptualization: DB and AB; Methodology: DB and AB; Investigation: DB and SS;

470 Analysis: DB; Original Draft: DB; Review and Editing: DB and AB; Resources: AB;

471 Supervision: AB.

#### 472 **Competing interests**

473 Authors declare no competing interests.

474

475

476

477

#### 478 **Figure Legends**

479 **Fig 1. Approach and no approach** – (a) Bar graph showing the number of groups showing  
480 approach responses in the two phases of the four cue conditions. (b) Bar graph showing the  
481 percentage of groups showing distant (position) no approach out of the total no approach. “a”  
482 and “b” indicate significant differences within the categories and “1” and “2” indicate  
483 significant differences between the categories.

484 **Fig 2. First behaviour during social cue** – Pie chart showing the percentage of different  
485 behaviours during the social cues provided in (a) NC, (b) FC, (c) LIT, and (d) HIT  
486 conditions.

487 **Fig 3. Duration of gazing at E1** – Box and Whiskers plot showing the duration of gazing at  
488 the E1. Boxes represent interquartile range, horizontal bars within boxes indicate median  
489 values, and whiskers represent the upper range of the data. “1” and “2” indicate significant  
490 differences between the categories (between social cue and food provision phase).

491 **Fig 4. Comparison of first behaviours between solitary and groups of dogs** - Bar graph  
492 showing the percentage of behaviours (first reactions in the SCP) shown by the solitary and  
493 groups of dogs towards the E1.

494 **Fig 5. Response Index (RI)** - Box and Whiskers plot showing the distribution of values of  
495 the RI in (a) FC, (b) LIT, and (c) HIT conditions.

496

497

498

499

500

501

502

503

504

505

506 **Fig 1 -**

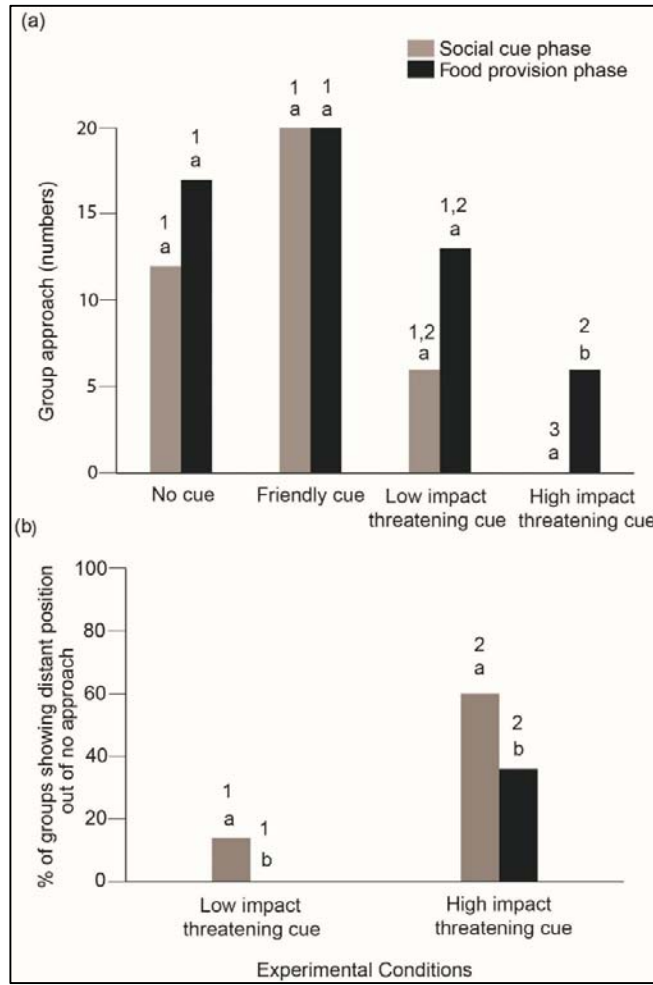

507

508 **Fig 2 –**

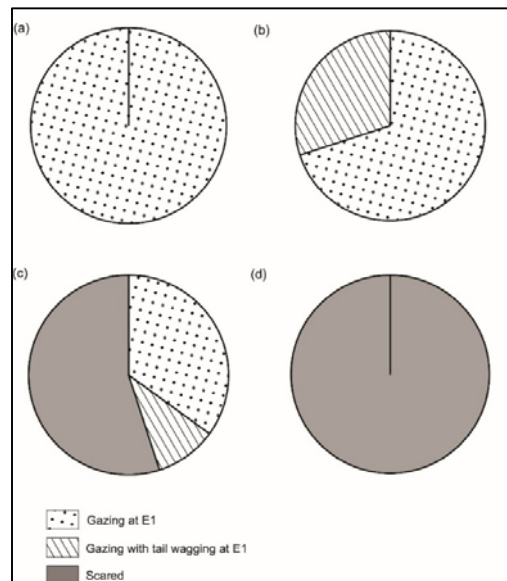

509

510 **Fig 3 –**

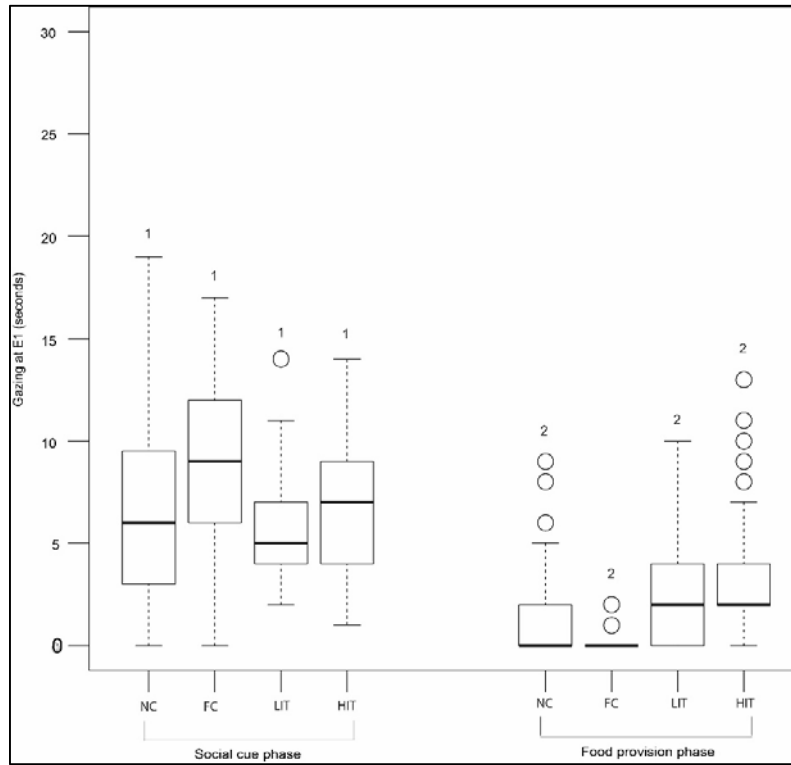

511

512 **Fig 4 –**

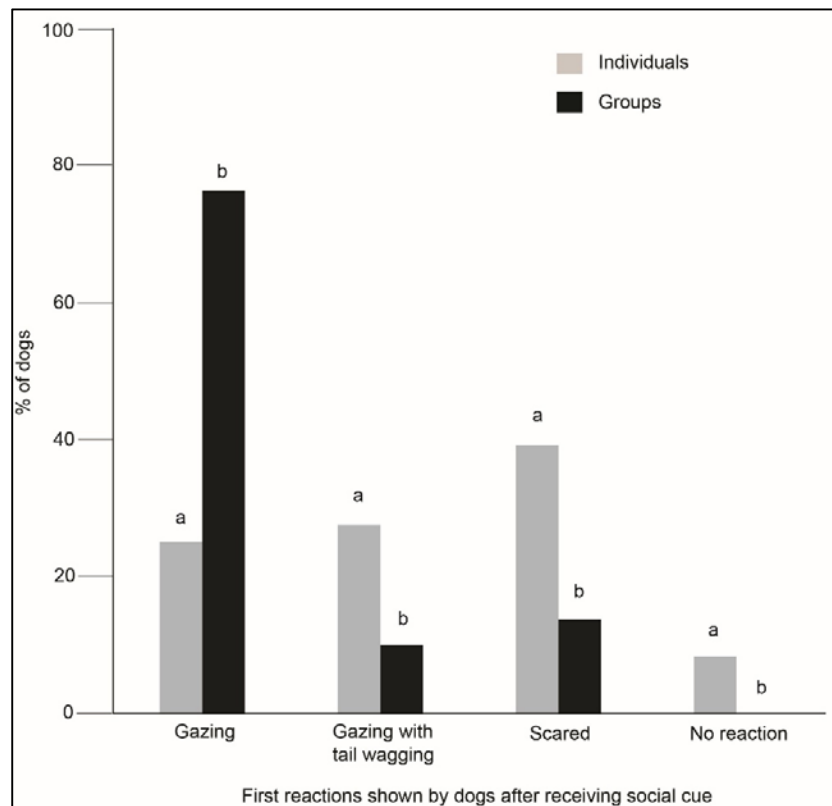

513

514 **Fig 5 –**

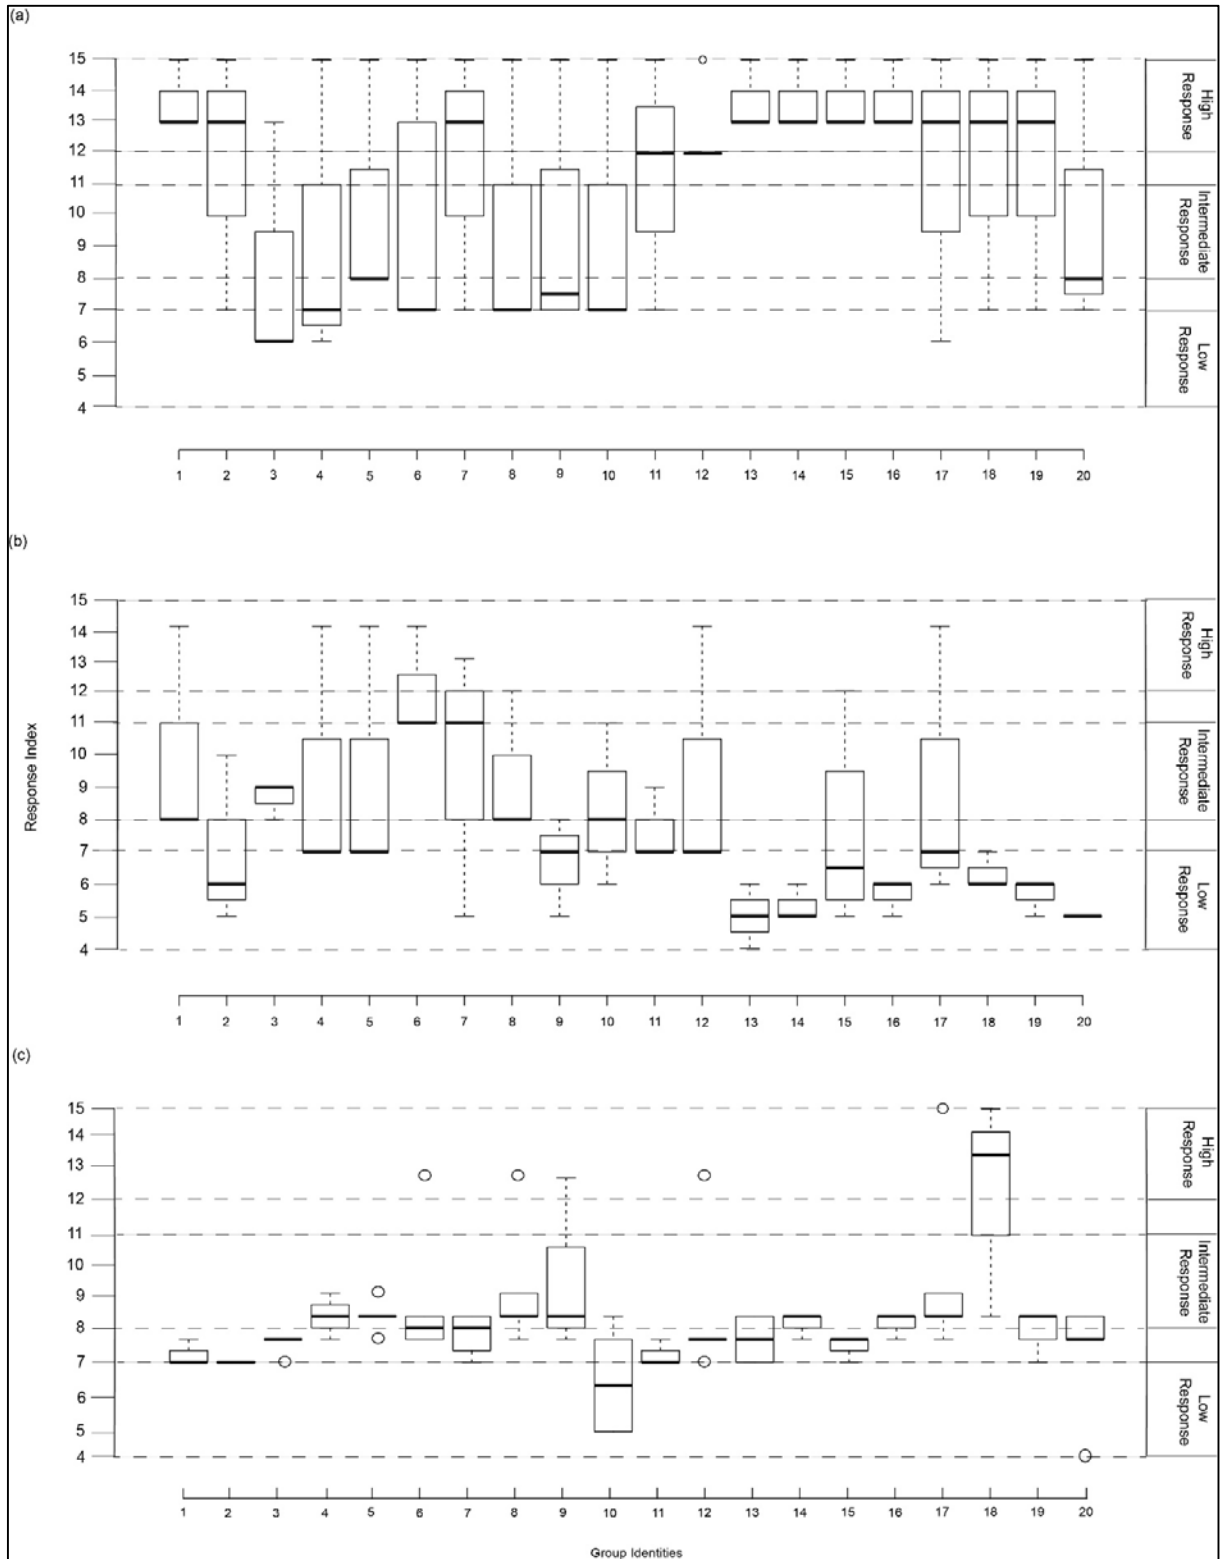

Source: https://www.biorxiv.org/content/10.1101/760108v1.full.pdf
